# Supplementary material for: Screening for resistance against Pseudomonas syringae in rice-FOX Arabidopsis lines identified a putative receptor-like cytoplasmic kinase gene that confers resistance to major bacterial and fungal pathogens in Arabidopsis and rice
Source: PubMed Central journal article supplement (PMC3118280; doi:10.1111/j.1467-7652.2010.00568.x), 2011-05
Supplement: pbi0009-0466-SD1.pdf [file pbi0009-0466-SD1.pdf]

## SUPPLEMENTARY MATERIAL

### Figure legends

**Figure S1** Screening for resistance to *Pst* DC3000 and *Colletotrichum higginsianum*.

(a) Standard methods. *Arabidopsis* is usually inoculated with *Pst* DC3000 by dip or infiltration method. Resistance level is usually evaluated by bacterial counts or lesion size in the infected plants. *Arabidopsis* is also inoculated by with droplets containing conidia of *C. higginsianum* and resistance/susceptibility is based on the resultant lesion size. (b) High throughput screening of the FOX lines employed in this study. Steps 1. Grow the FOX lines in 60-well plates for 3 weeks in aseptic condition, 2. Dip inoculate with *Pst* DC3000 or *C. higginsianum*, 3. Incubate, 4. Record image by digital photography of reflected light (green) under white light or fluorescent light (red) under UV.

**Figure S2** Protein sequence analyses between BSR1 and related RLCKs.

Alignment (a) and phylogenic tree (b) for BSR1 and related RLCKs. Protein sequence data are from rice (BSR1/AK070024), *Arabidopsis* (NAK/At5g02290, BIK1/At2g39660, and PBS1/At5g13160) and tomato (TPK1b/EU555286, and PTO/DQ019170). Black and gray backgrounds indicate identical and similar amino acids, respectively. Numbers at nodes indicate bootstrap values. The bar corresponds to 0.1 amino acid substitutions per site. VIIa VIIb and VIIc represent the subfamilies of RLCKs.

Figure S1

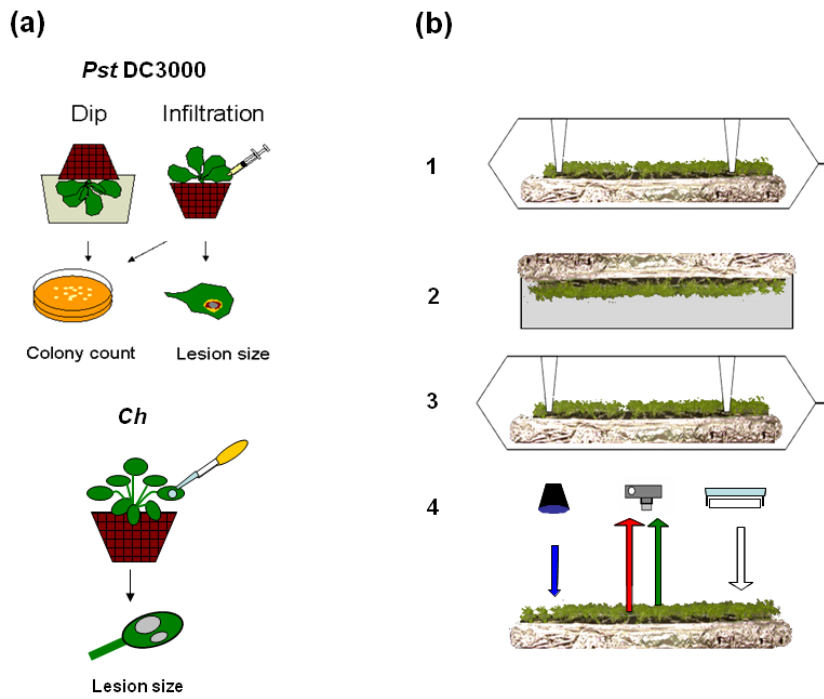

Figure S2

(a)

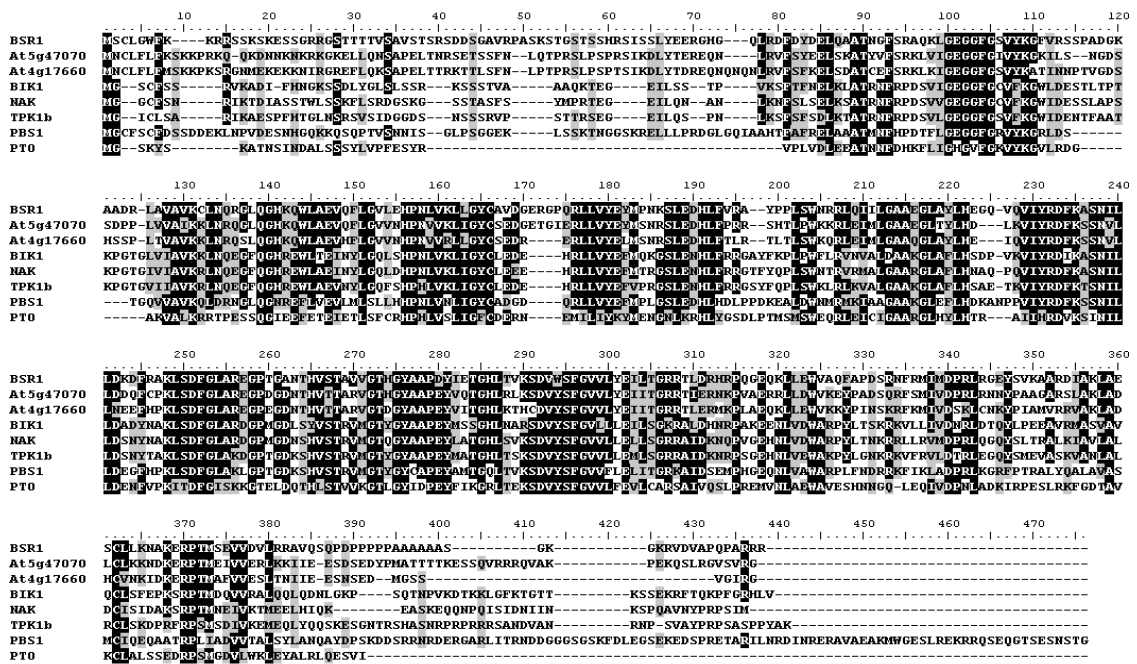

(b)

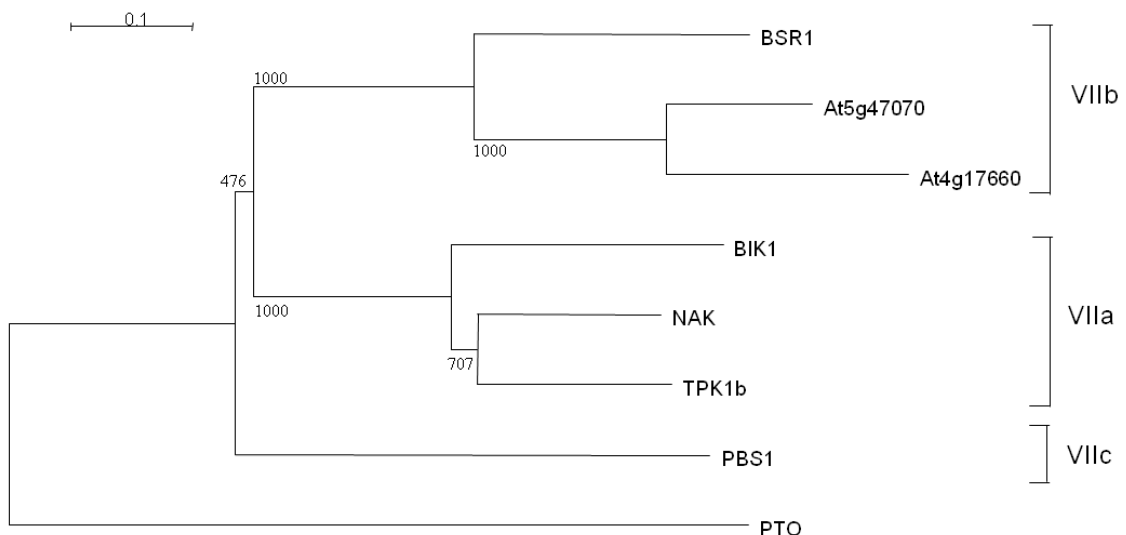

**Table S1** Primers used for qRT-PCR

| Accession No.                 | Forward                | Reverse                 |
|-------------------------------|------------------------|-------------------------|
| AK059694<br>(reference)       | AAGGCATGGCTGATTCATGT   | CAGATGTTACATGGTGACAGTA  |
| AK066255<br>( <i>WRKY45</i> ) | TTCGGTGGTCGTCAAGAAC    | CGTGCACAGCTGGTCGTA      |
| AK068993<br>( <i>PAL</i> )    | CAAAGAGAGCTCATCAGATTCC | ATGACCGTCGGTGCCAGT      |
| AK068846                      | GGCTTCCTCAAGACAAAACG   | TCGTCGTGTTTCACCAAAAA    |
| AK103699                      | AGACCCTGCTTCGCTGGA     | ATCACCATGGCGAAAAACAG    |
| AK072201                      | TCACTTAATTGGCCGAAGAGA  | CCTGTCAGGGCCTCACTACT    |
| AK070024                      | AGGTGAGGTTGCACTCTGCT   | CCAAGAATCCACCAACTCGT    |
| AK100547                      | AGCTCTTGTGGGCAGTCATT   | CGAATGGAAAGTAAACCTGACC  |
| AK072899                      | CTGGACACCAGCCTTTTGT    | GCTTGTCTTTCTTCGGTGAATC  |
| AK102525                      | ATTTTCTCTTCGCGCTTCTG   | TGCATATTTTCACAGTTTTGCAC |
| AK102125                      | GCTGTTACGGCAAACGGTTA   | CTCCAAGTCCCAGTTCAAA     |
| AK099032                      | TGCTTTTCTTTTTCGCTCT    | TTTGCTCAAATTGTCCAGA     |
| AK069592                      | GGCCGTTGATTGGTGAATC    | ACCGGCACATACACAAAA      |
